# Supplementary material for: Various lithospheric deformation patterns derived from rheological contrasts between continental terranes: Insights from 2-D numerical simulations
Source: Copernicus journal article supplement (doi:10.5194/egusphere-2023-2736), 2023-11-23
Supplement: Supplementary file [file egusphere-2023-2736-AC1-supplement.pdf]

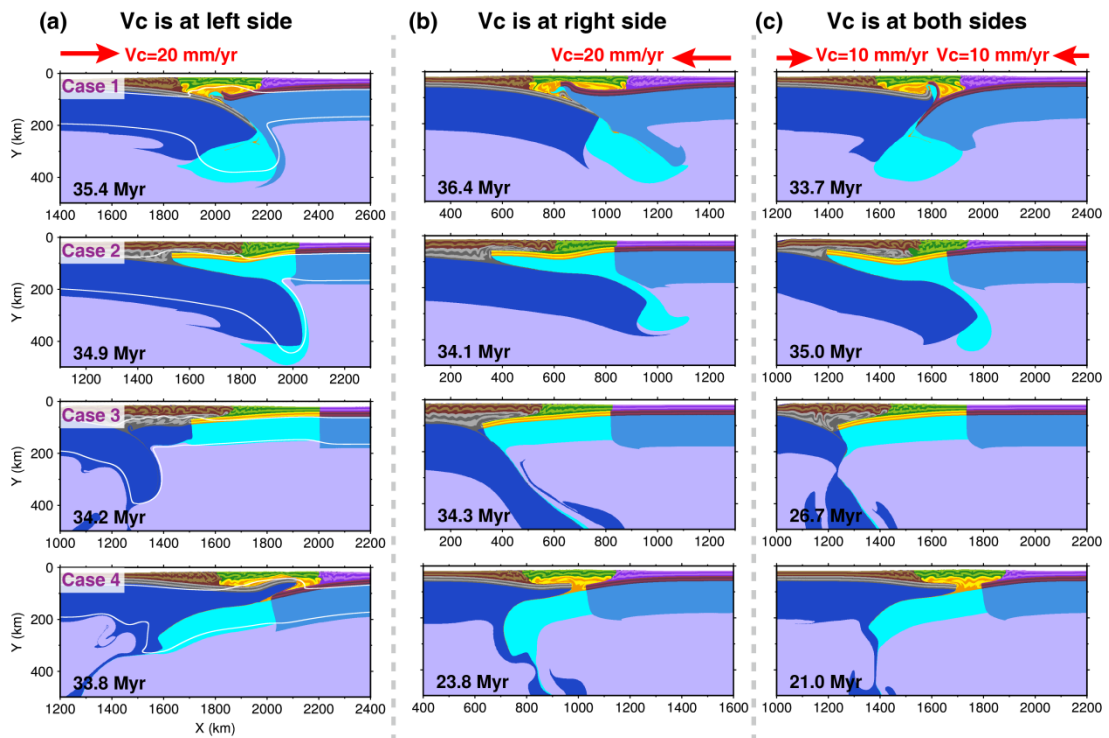

Figure R5. Effects of the direction of the convergence rate. (a), (b) and (c) are the final simulation results of models with different convergence directions, and (a) is the final simulation results of Cases 1-4 (reference examples).
