# Supplementary material for: Various lithospheric deformation patterns derived from rheological contrasts between continental terranes: Insights from 2-D numerical simulations
Source: Copernicus journal article supplement (doi:10.5194/egusphere-2023-2736), 2023-11-23
Supplement: Supplementary file [file egusphere-2023-2736-RC1-supplement.zip]

# Various lithospheric deformation patterns derived from rheological contrasts between continental terranes: Insights from 2-D numerical simulations

Renxian Xie<sup>1,2</sup>, Lin Chen<sup>3</sup>, Jason P. Morgan<sup>2</sup>, Yongshun John Chen<sup>2\*</sup>

<sup>1</sup>School of Transportation Engineering, EAST CHINA JIAOTONG UNIVERSITY, Nanchang, 330013, China

<sup>2</sup>Department of Ocean Science and Engineering, Southern University of Science and Technology, Shenzhen, 518055, China

<sup>3</sup>State Key Laboratory of Lithospheric Evolution, Institute of Geology and Geophysics, Chinese Academy of Sciences, Beijing, 100029, China

*\*Corresponding author:* Yongshun John Chen (johnyc@sustech.edu.cn)

**Table S1. Strength scaling factors for four distinct rheological models.** CB-I and CB-II, Crème brûlée model with a strong and weak lower crust, respectively; JS-I and JS-II, Jelly sandwich model with a strong and weak lower crust, respectively.  $S_{UC}$ ,  $S_{LC}$ , and  $S_{LM}$  are strength scaling factors for the upper and lower crust and lithospheric mantle, respectively.

| Rheological model | $S_{UC}$ | $S_{LC}$ | $S_{LM}$ |
|-------------------|----------|----------|----------|
| CB-I              | 1        | 10       | 0.1      |
| CB-II             | 1        | 0.1      | 0.1      |
| JS-I              | 1        | 10       | 1        |
| JS-II             | 1        | 0.1      | 1        |

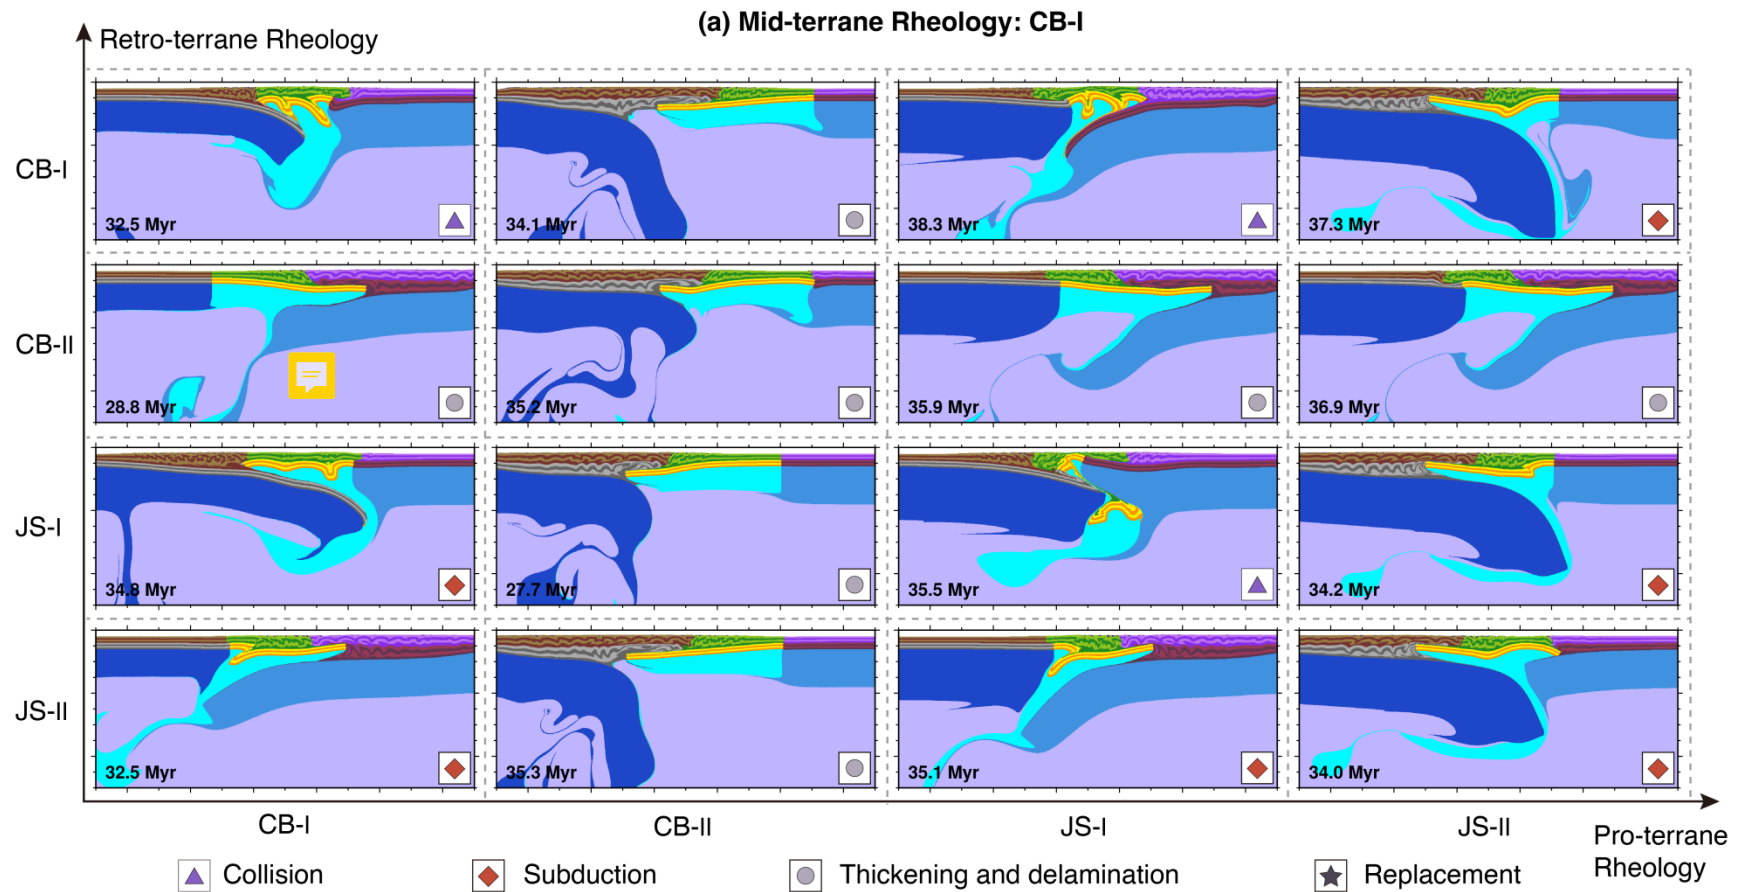

**Figure S1. Simulation results display four styles of lithosphere deformation patterns. (a) – (d)** Simulation results of models in which lithospheric rheology for the Mid-terrane is CB-I, CB-II, JS-I and JS-II, respectively. Different symbols indicate distinct deformation styles, including lithosphere collision, subduction, thickening and delamination, and replacement.

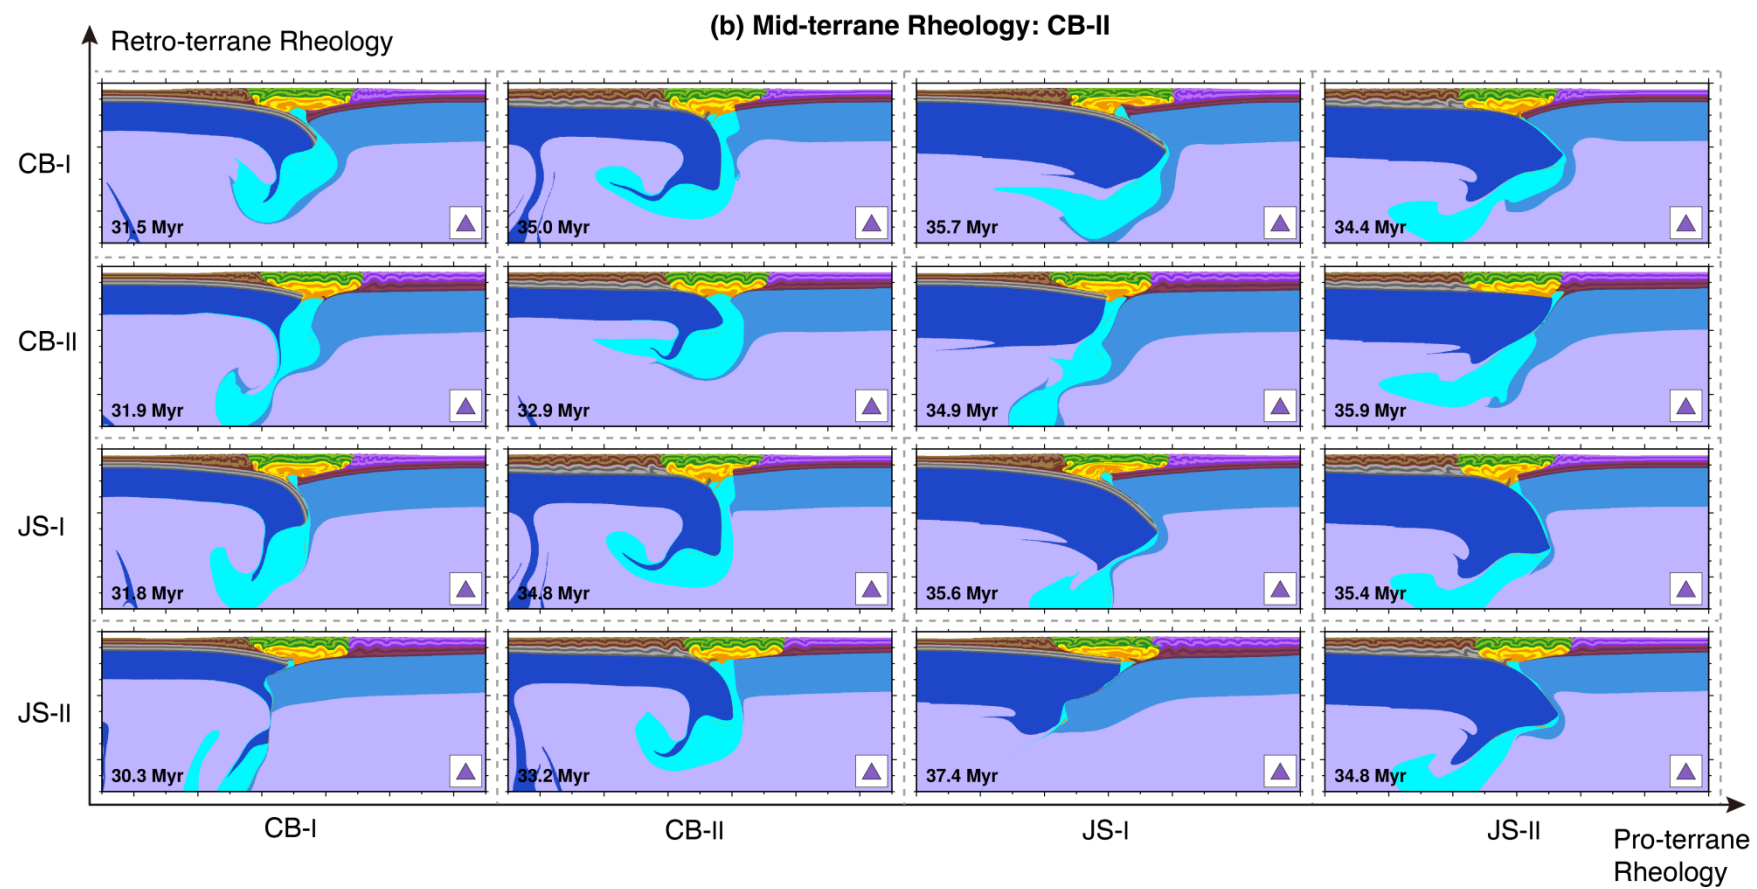

Figure S1. (Continued).

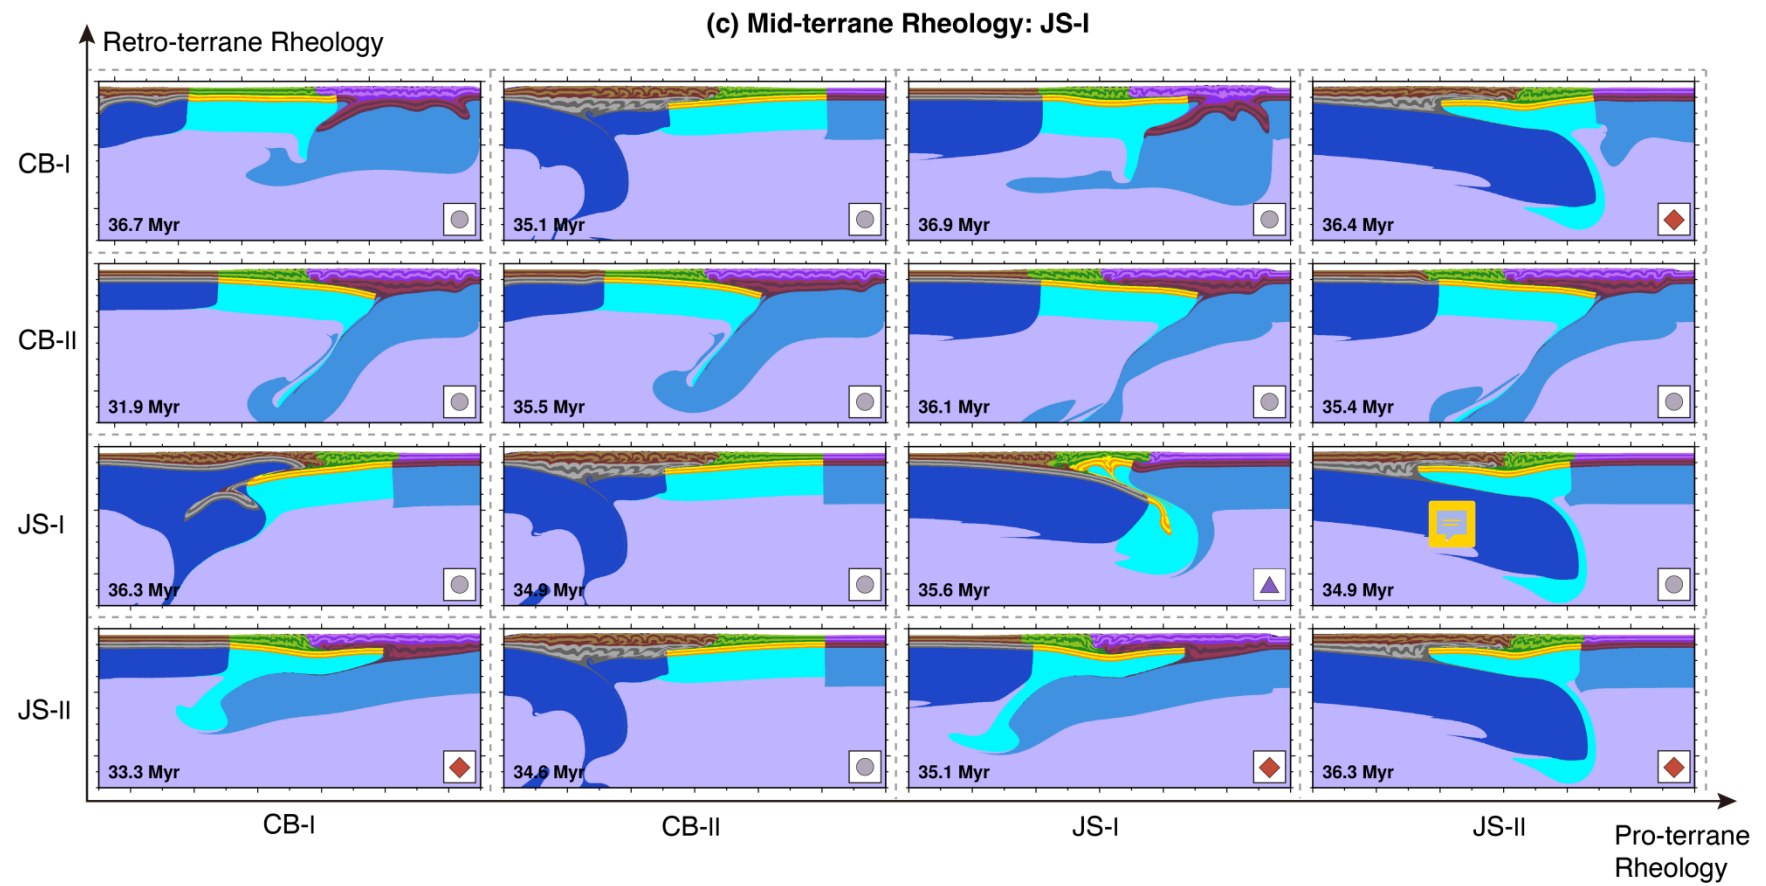

Figure S1. (Continued).

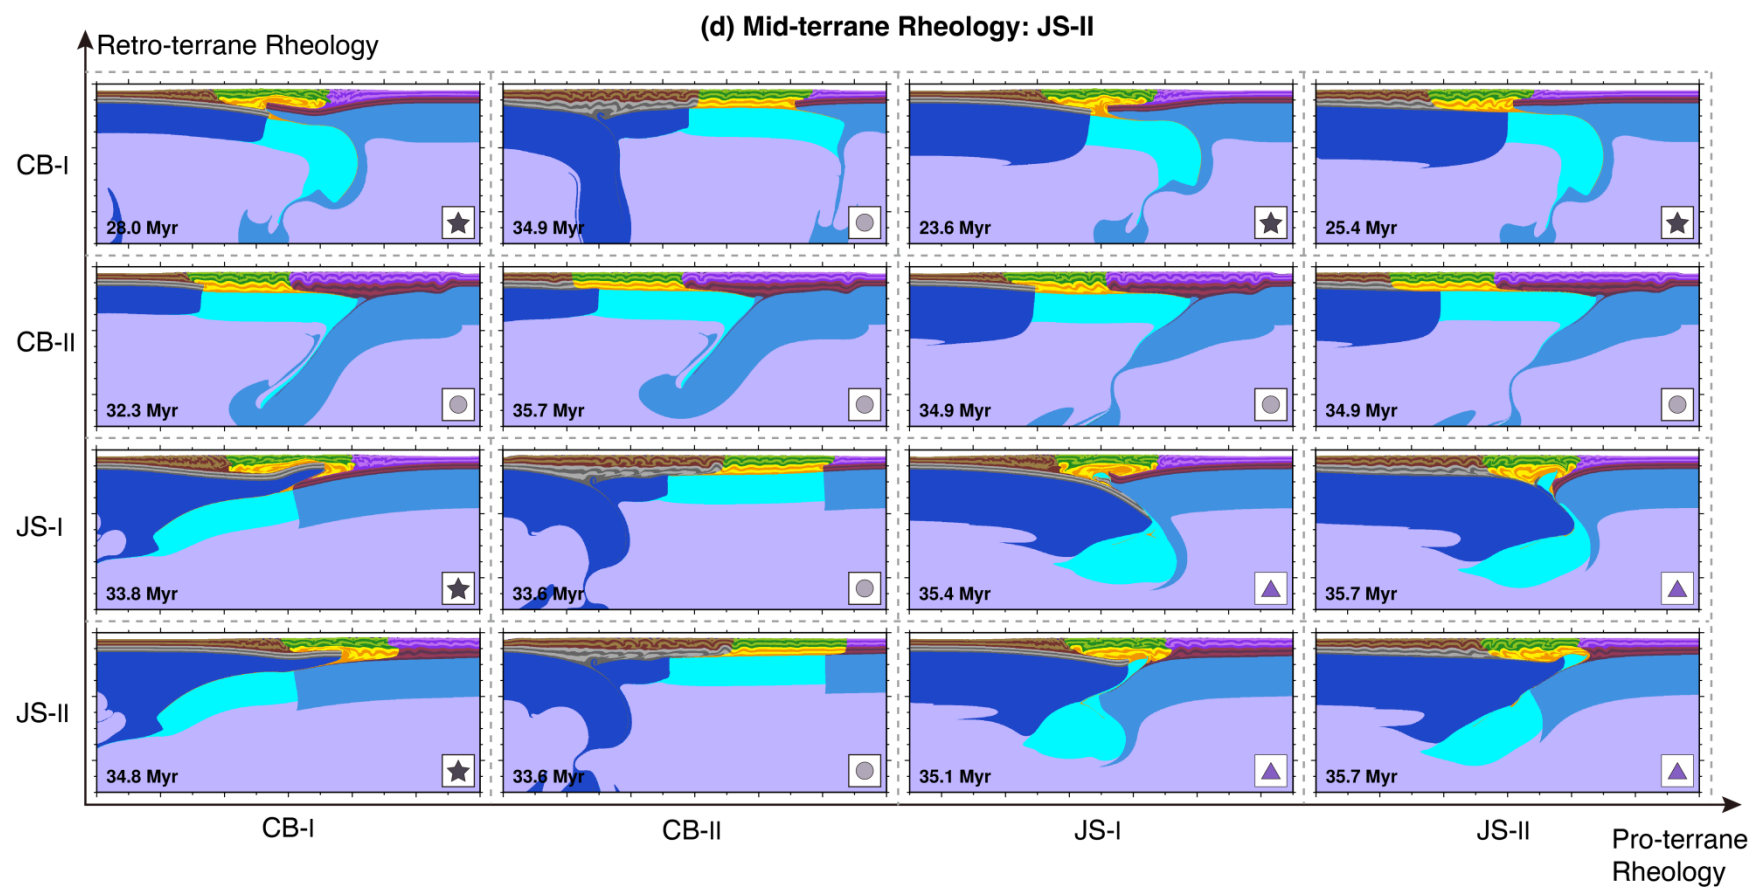

Figure S1. (Continued).

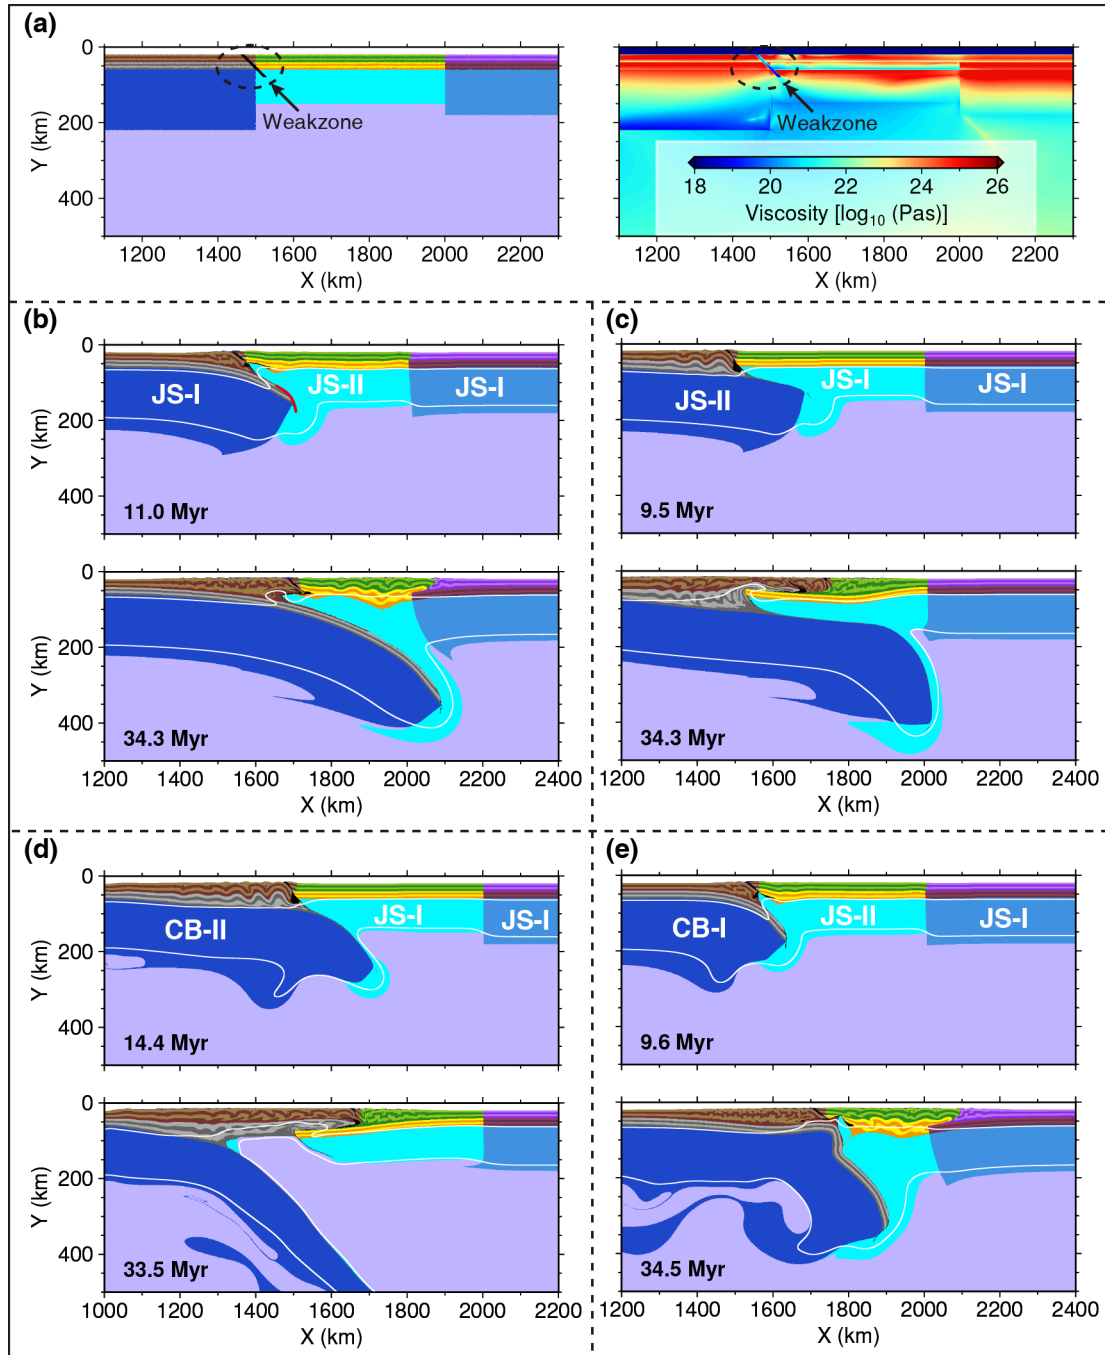

**Figure S2. Effects of the local weak zone on lithosphere deformation.** (a) Details about the weak zone. (b) – (e) Final simulation results of models corresponding to Cases 1 – 4, respectively.
